# Supplementary material for: Current and Desired Quality of Life in People with Parkinson’s Disease: The Calman Gap Increases with Depression
Source: PubMed Central journal article supplement (PMC7290961; doi:10.3390/jcm9051496), 2020-05-15
Supplement: jcm-09-01496-s001.pdf [file jcm-09-01496-s001.pdf]

Supplement

Table S1. Quality of Life Questionnaire.

| Topic                        | Item                                                                                                                                    | 100%                                         | 0%                                    |
|------------------------------|-----------------------------------------------------------------------------------------------------------------------------------------|----------------------------------------------|---------------------------------------|
| <b>Fitness</b>               | How fit do you feel?                                                                                                                    | I could run a marathon tomorrow.             | I cannot get up without help.         |
| <b>State of health</b>       | How do you assess your state of health?                                                                                                 | Extremely good                               | Extremely bad                         |
| <b>Pain</b>                  | Do you suffer from pain?                                                                                                                | Every day                                    | Never                                 |
| <b>Climbing stairs</b>       | Do you have difficulties climbing stairs?                                                                                               | I can easily climb as many stairs as I want. | I cannot climb stairs without help.   |
| <b>Physical activities</b>   | Are you affected by your current state of health during daily activities (kneeling, picking up something, shopping, cleaning up, etc.)? | No, I am not restricted in any way.          | Yes, I am completely restricted       |
| <b>Occupational position</b> | With the position I have in my profession, I am ... (Retired persons please rate former occupation)                                     | Extremely satisfied                          | Extremely dissatisfied                |
| <b>Occupational stress</b>   | With the extent of my professional demands and burdens I am ... (Retired persons please rate former occupation)                         | Extremely satisfied                          | Extremely dissatisfied                |
| <b>Occupational esteem</b>   | I experience appreciation from my colleagues at work. (Retired persons please rate former occupation)                                   | Every day I experience appreciation          | I do not experience esteem on any day |
| <b>Income</b>                | With my wage / income I am...                                                                                                           | Extremely satisfied                          | Extremely dissatisfied                |
| <b>Lifestyle</b>             | With my lifestyle I am...                                                                                                               | Extremely satisfied                          | Extremely dissatisfied                |
| <b>Financial budget</b>      | Are you satisfied with the financial means that you have at your disposal?                                                              | Yes, I can afford anything I want.           | No, I cannot afford any luxury        |
| <b>Workday quitting time</b> | With the way I spend my evening, I am...                                                                                                | Extremely satisfied                          | Extremely dissatisfied                |
| <b>Hobbies</b>               | Do you have time for your hobbies?                                                                                                      | Yes, I can do my hobbies whenever I want.    | No, I never get to do my hobbies.     |
| <b>Friends</b>               | How often do you meet with friends, relatives or work colleagues?                                                                       | Every day                                    | Never                                 |
| <b>Partnership</b>           | The quality of my partnership makes me...                                                                                               | Extremely satisfied                          | Extremely dissatisfied                |

Table S2. Values for the 15 QoL questionnaire items for current state, desired state and the difference between current and desired state.

| Questionnaire item | Subjects with epilepsy |      | Subjects with Parkinson's disease |      | Control subjects |      |
|--------------------|------------------------|------|-----------------------------------|------|------------------|------|
|                    | Mean                   | SD   | Mean                              | SD   | Mean             | SD   |
| <b>Current QoL</b> |                        |      |                                   |      |                  |      |
| Fitness            | 55.8                   | 23.6 | 41.6                              | 22.4 | 63.7             | 22.2 |

**Prell et al.: Current and desired quality of life in people with Parkinson's Disease: the Calman Gap increases with depression**

|                                                   |      |      |      |      |      |      |
|---------------------------------------------------|------|------|------|------|------|------|
| State of health                                   | 60.6 | 19.8 | 48.1 | 20.9 | 71.7 | 16.0 |
| Climbing stairs                                   | 74.8 | 22.0 | 53.2 | 26.6 | 80.1 | 20.7 |
| Physical activities                               | 77.0 | 23.7 | 48.2 | 23.2 | 77.2 | 20.7 |
| Pain                                              | 58.6 | 29.8 | 53.0 | 31.1 | 62.2 | 30.5 |
| Occupational position                             | 73.5 | 25.7 | 70.7 | 26.9 | 77.4 | 21.2 |
| Occupational stress                               | 73.4 | 21.2 | 58.1 | 30.3 | 73.2 | 23.0 |
| Occupational esteem                               | 70.8 | 24.0 | 76.3 | 24.4 | 74.9 | 23.3 |
| Income                                            | 49.7 | 34.9 | 66.4 | 21.9 | 69.1 | 19.9 |
| Financial budget                                  | 62.4 | 30.5 | 67.4 | 23.5 | 75.8 | 20.2 |
| Workday quitting time                             | 71.1 | 21.6 | 64.9 | 21.7 | 70.8 | 20.7 |
| Hobbies                                           | 78.2 | 19.7 | 64.9 | 24.2 | 63.8 | 26.6 |
| Friends                                           | 57.2 | 22.7 | 57.4 | 21.8 | 56.4 | 24.5 |
| Lifestyle                                         | 75.0 | 21.0 | 63.8 | 24.3 | 70.1 | 20.3 |
| Partnership                                       | 75.0 | 28.7 | 75.3 | 23.5 | 75.4 | 24.9 |
| <b>Desired QoL</b>                                |      |      |      |      |      |      |
| Fitness                                           | 77.0 | 23.6 | 72.9 | 20.5 | 80.3 | 15.1 |
| State of health                                   | 86.6 | 13.9 | 80.6 | 14.7 | 87.0 | 11.5 |
| Climbing stairs                                   | 93.1 | 11.6 | 81.4 | 17.8 | 91.0 | 12.3 |
| Physical activities                               | 91.0 | 15.2 | 80.7 | 18.4 | 91.0 | 12.5 |
| Pain                                              | 92.1 | 14.4 | 85.7 | 14.8 | 90.8 | 13.0 |
| Occupational position                             | 94.7 | 9.4  | 87.2 | 16.4 | 90.6 | 9.8  |
| Occupational stress                               | 93.4 | 10.8 | 81.4 | 20.7 | 89.1 | 11.9 |
| Occupational esteem                               | 93.6 | 10.8 | 86.5 | 17.5 | 89.7 | 11.6 |
| Income                                            | 91.8 | 14.1 | 87.7 | 11.5 | 92.2 | 9.1  |
| Financial budget                                  | 91.4 | 11.9 | 87.4 | 11.2 | 91.7 | 8.1  |
| Workday quitting time                             | 92.2 | 10.1 | 85.0 | 10.7 | 88.7 | 10.7 |
| Hobbies                                           | 93.4 | 8.1  | 82.4 | 16.9 | 88.3 | 12.1 |
| Friends                                           | 78.4 | 17.7 | 75.5 | 15.6 | 74.9 | 16.5 |
| Lifestyle                                         | 94.4 | 6.8  | 88.0 | 11.8 | 88.4 | 9.9  |
| Partnership                                       | 90.0 | 13.9 | 88.4 | 11.9 | 92.0 | 8.6  |
| <b>Difference between current and desired QoL</b> |      |      |      |      |      |      |
| Fitness                                           | 21.2 | 19.3 | 31.8 | 19.3 | 17.2 | 21.6 |
| State of health                                   | 26.0 | 13.6 | 32.7 | 18.9 | 16.1 | 14.8 |
| Climbing stairs                                   | 19.4 | 16.7 | 27.4 | 19.7 | 11.4 | 13.0 |
| Physical activities                               | 14.0 | 17.1 | 32.2 | 20.1 | 14.4 | 15.7 |
| Pain                                              | 33.8 | 26.3 | 32.9 | 29.4 | 27.2 | 27.0 |
| Occupational position                             | 21.2 | 21.4 | 17.0 | 20.0 | 14.2 | 18.9 |
| Occupational stress                               | 20.0 | 16.2 | 22.7 | 24.1 | 16.6 | 20.0 |
| Occupational esteem                               | 22.8 | 24.3 | 9.7  | 14.5 | 14.0 | 19.0 |
| Income                                            | 39.5 | 31.7 | 21.5 | 19.5 | 23.9 | 19.6 |
| Financial budget                                  | 29.0 | 27.1 | 20.4 | 19.4 | 15.9 | 16.9 |
| Workday quitting time                             | 21.1 | 20.0 | 20.0 | 18.7 | 18.7 | 19.2 |
| Hobbies                                           | 15.2 | 19.8 | 17.5 | 21.6 | 25.4 | 25.4 |
| Friends                                           | 21.2 | 20.2 | 18.2 | 18.3 | 18.5 | 23.9 |
| Lifestyle                                         | 19.6 | 17.3 | 24.8 | 23.8 | 18.8 | 17.2 |
| Partnership                                       | 15.5 | 21.2 | 13.6 | 19.3 | 17.9 | 23.9 |

Prell et al.: Current and desired quality of life in people with Parkinson's Disease: the Calman Gap increases with depression

QoL indicates quality of life; SD, standard deviation.

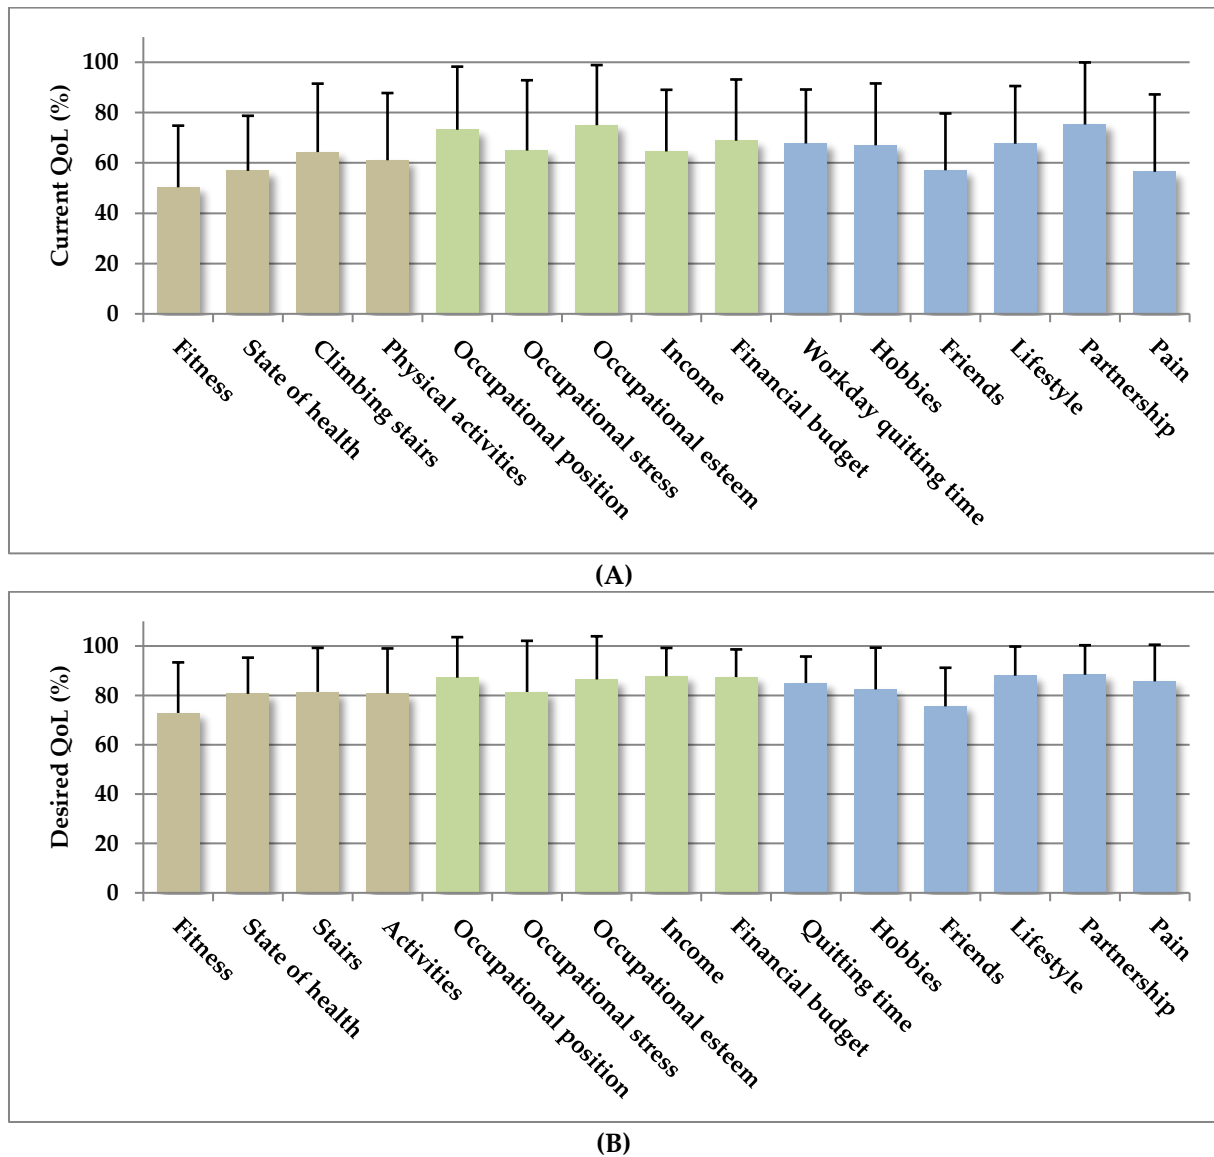

Figure S1. A. Current Quality of Life (QoL) in people with Parkinson's disease for all 15 items (mean and standard deviation). B. Desired QoL in people with Parkinson's disease for all 15 items (mean and standard deviation).

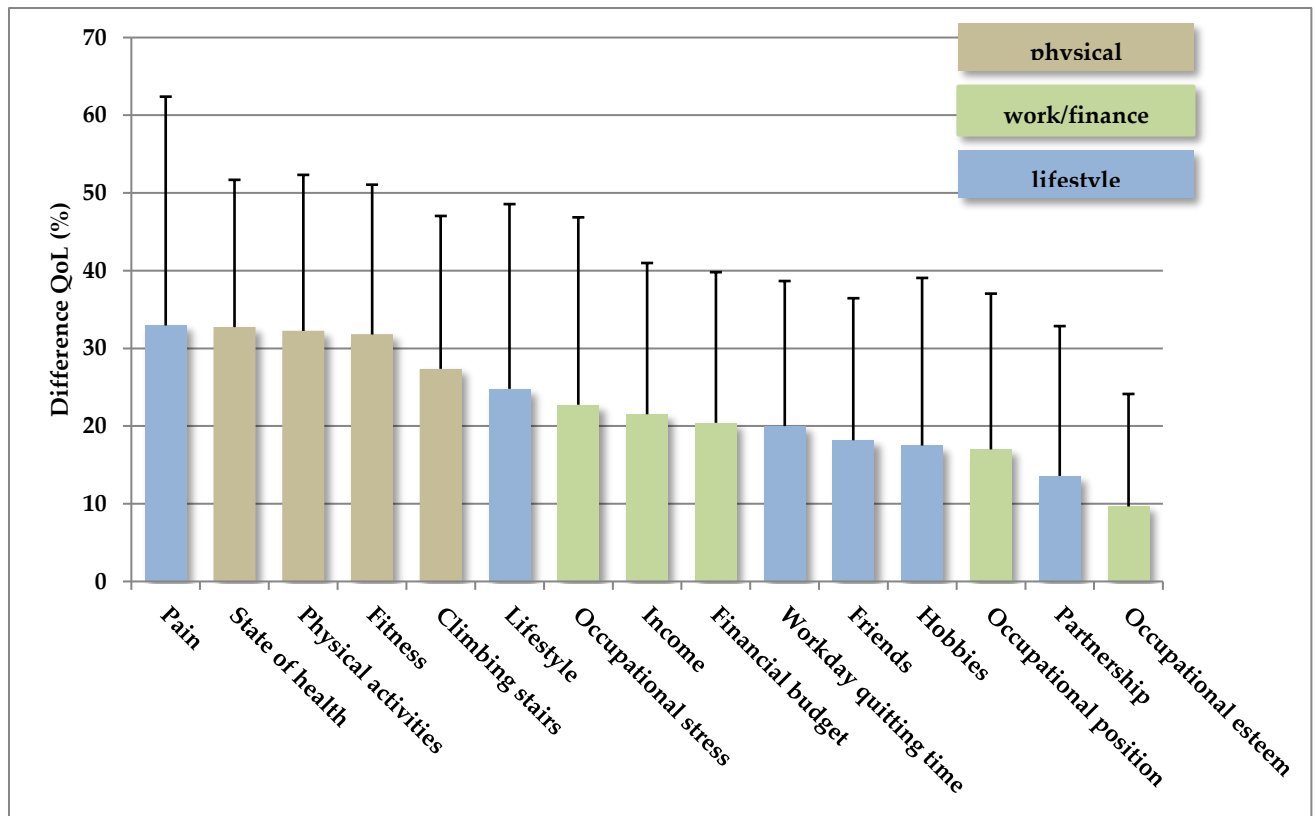

**Figure S2.** Difference between current and desired Quality of Life (QoL) in people with Parkinson's disease for all 15 items (mean and standard deviation).
